# Supplementary material
Source: PubMed Central journal article supplement (PMC5487624)
Supplement: AAC.00073-17_zac007176285s1.pdf [file AAC.00073-17_zac007176285s1.pdf]

## Supplemental Material

**Supplemental Table 1.** PCR primers used for amplification of genes.

| <b>Target</b>                 | <b>Primer</b> | <b>Sequence (5'-3')</b>   |
|-------------------------------|---------------|---------------------------|
| <i>bla<sub>KPC</sub></i> type | KPC-F         | TCGCTAAACTCGAACAGG        |
|                               | KPC-R         | TTACTGCCCCGTTGACGCCCAATCC |
| <i>bla<sub>NDM-1</sub></i>    | NDM-F         | TTGGCCTTGCTGTCCTTG        |
|                               | NDM-R         | ACACCAGTGACAATATCACCG     |
| <i>bla<sub>GES</sub></i> type | GES-F         | CTATTACTGGCAGGGATCG       |
|                               | GES-R         | CCTCTCAATGGTGTGGGT        |
| <i>bla<sub>OXA-48</sub></i>   | OXA-48-F      | TGTTTTTGGTGGCATCGAT       |
|                               | OXA-48-R      | GTAAMRATGCTTGGTTCGC       |
| <i>bla<sub>IMP</sub></i> type | IMP-F         | GAGTGGCTTAATTCTCRATC      |
|                               | IMP-R         | A ACTAYCCAATAYRTAAC       |
| <i>bla<sub>VIM</sub></i> type | VIM-F         | GTTTGGTTCGCATATCGCAAC     |
|                               | VIM-R         | AATGCGCAGCACCAGGATAG      |
| <i>bla<sub>OXA-40</sub></i>   | OXA40-intF    | CACCTATGGTAATGCTCTTGC     |
|                               | OXA40-intR    | GTGGAGTAACACCCATTCC       |
| <i>mgrB</i>                   | mgrB-F        | TTAAGAAGGCCGTGCTATCC      |
|                               | mgrB-R        | AAGGCGTTCATTCTACCACC      |
| <i>tet B</i>                  | tetB-F        | TACGTGAATTTATTGCTTCGG     |
|                               | tetB-R        | ATACAGCATCCAAAGCGCAC      |

Forward primer, F; Reverse primer, R.

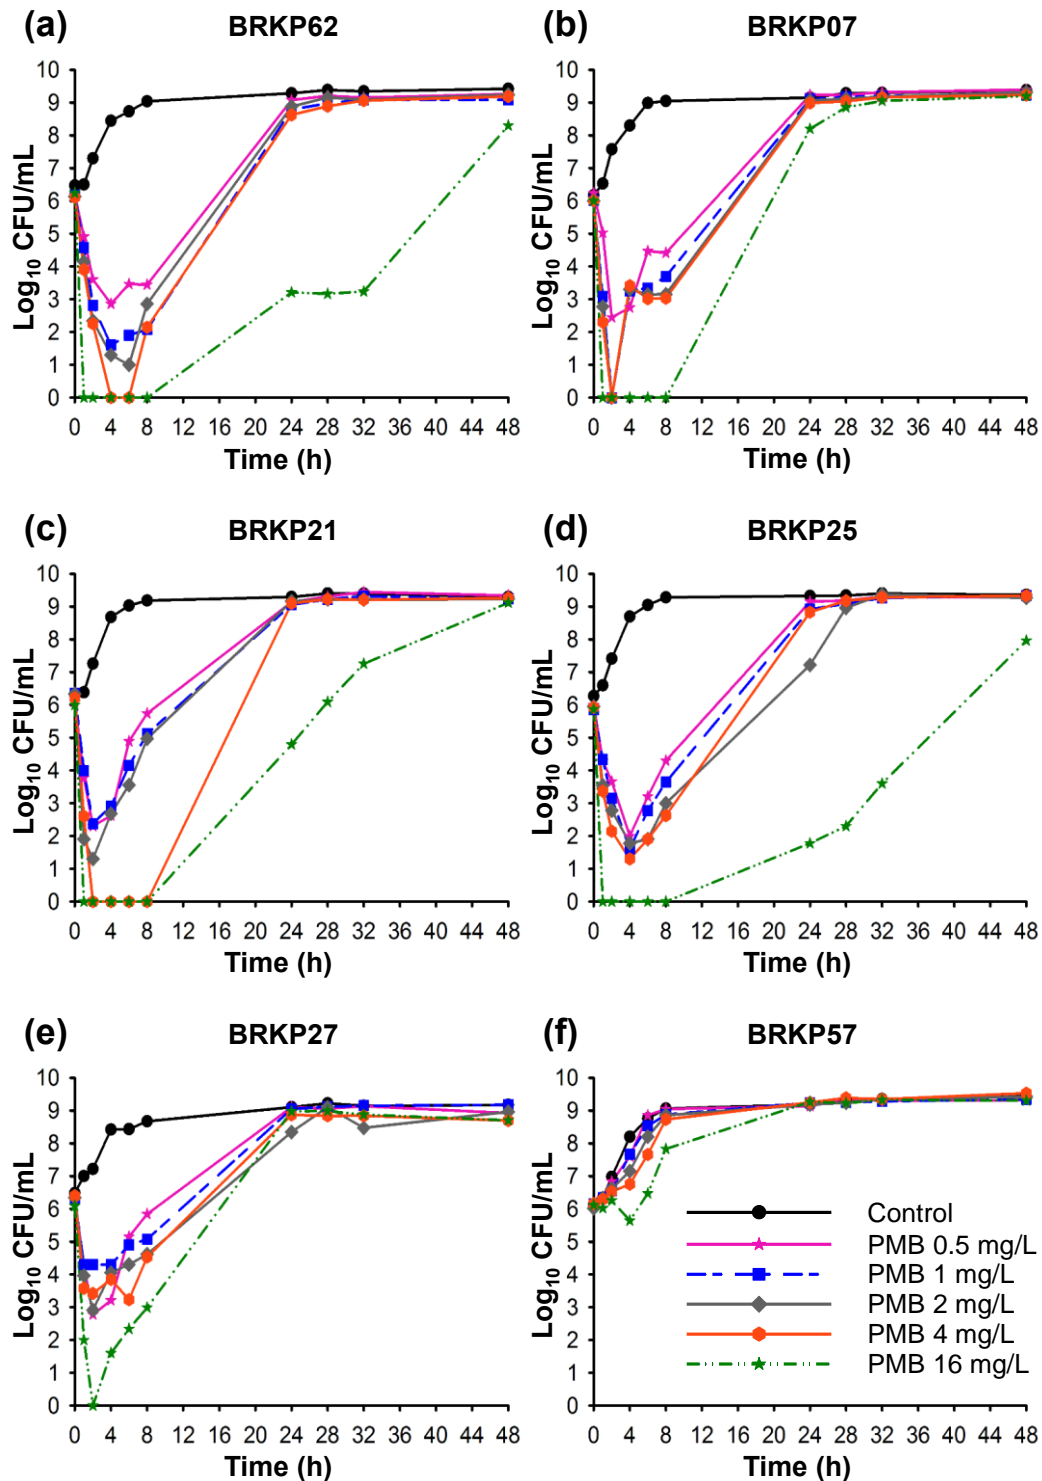

**Supplemental Figure S1.** Time-kill profiles of polymyxin B (PMB) concentrations (mg/L) against KPC-producing *K. pneumoniae* clinical isolates: (a) BRKP62 (polymyxin B MIC: <0.5 mg/L, minocycline MIC: 4 mg/L), (b) BRKP07 (polymyxin B MIC: 0.5 mg/L, minocycline MIC: 2 mg/L), (c) BRKP21 (polymyxin B MIC: 0.5 mg/L, minocycline MIC: 16 mg/L), (d) BRKP25 (polymyxin B MIC: 0.5 mg/L, minocycline MIC: 32 mg/L), (e) BRKP27 (polymyxin B MIC: 1.0 mg/L, minocycline MIC: 8 mg/L), and (f) BRKP57 (polymyxin B MIC: 64 mg/L, minocycline MIC: 4 mg/L).

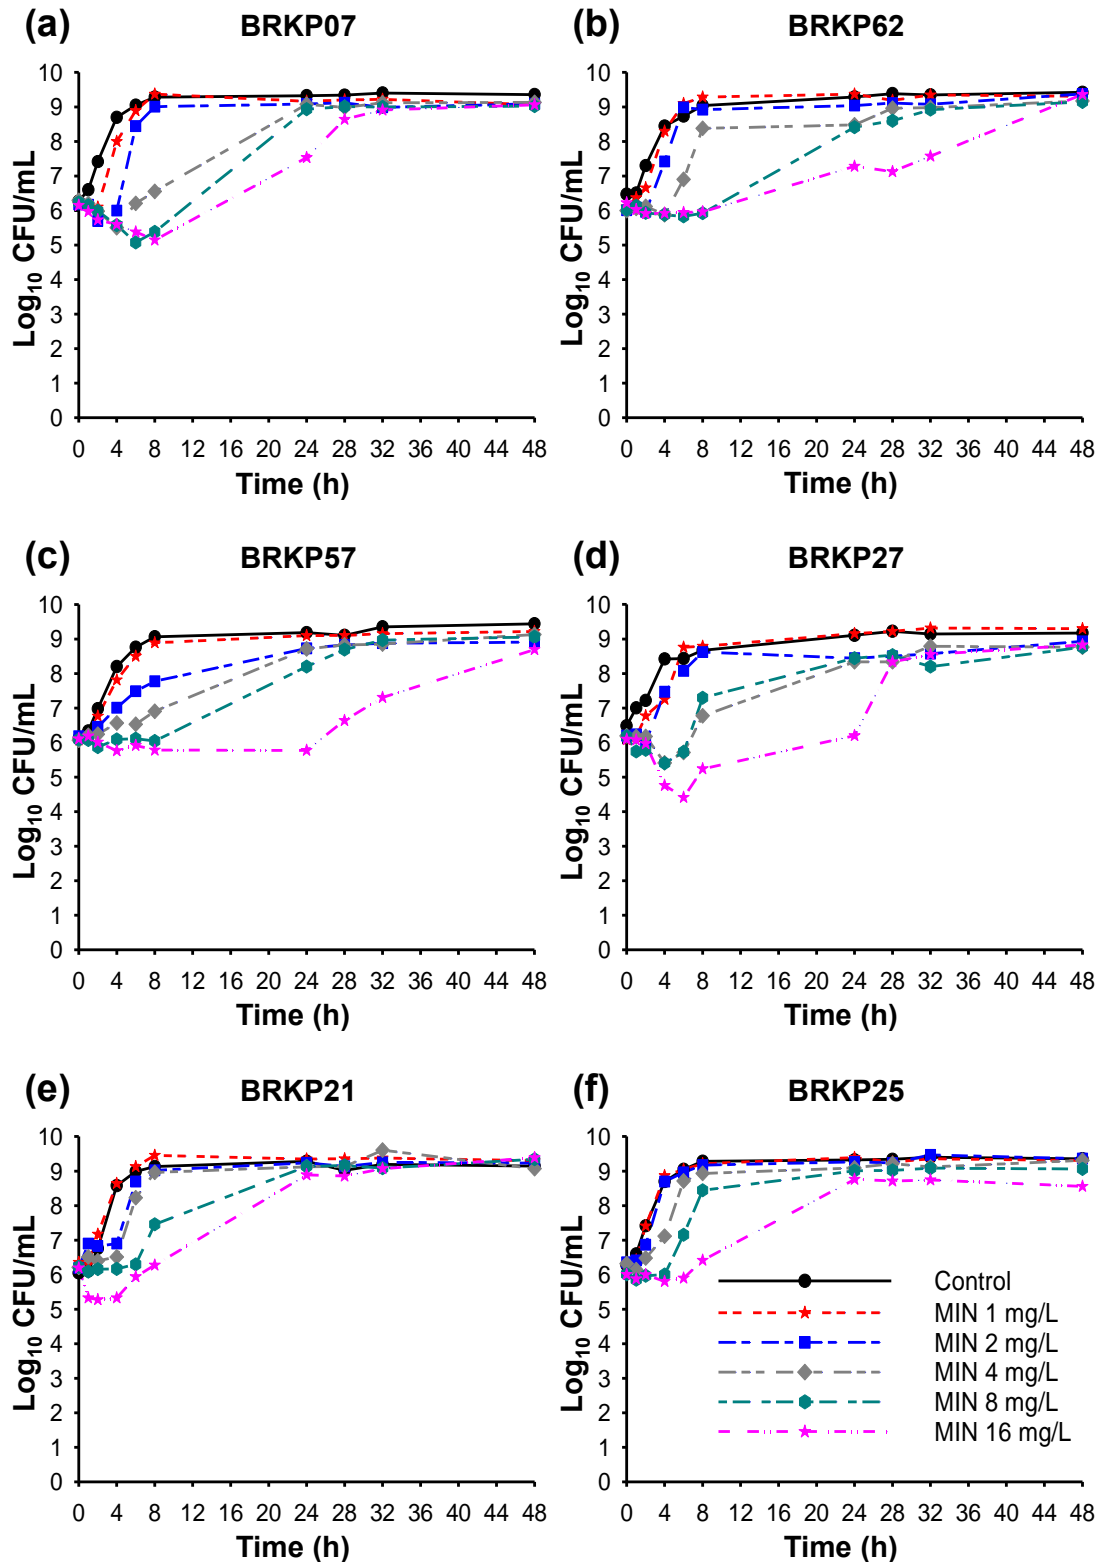

**Supplemental Figure S2.** Time-kill profiles of minocycline (MIN) concentrations (mg/L) against KPC-producing *K. pneumoniae* clinical isolates: (a) BRKP07 (minocycline MIC: 2 mg/L, polymyxin B MIC: 0.5 mg/L), (b) BRKP62 (minocycline MIC: 4 mg/L, polymyxin B MIC: <0.5 mg/L), (c) BRKP57 (minocycline MIC: 4 mg/L, polymyxin B MIC: 64 mg/L), (d) BRKP27 (minocycline MIC: 8 mg/L, polymyxin B MIC: 1.0 mg/L), (e) BRKP21 (minocycline MIC: 16 mg/L, polymyxin B MIC: 0.5 mg/L), and (f) BRKP25 (minocycline MIC: 32 mg/L, polymyxin B MIC: 0.5 mg/L).



**Supplemental Figure S3.** Time–kill curves of polymyxin B (PMB) 0.5, 1, 2, and 4 mg/L in combination with minocycline (MIN) 1, 2, 4, 8, and 16 mg/L against an inocula of  $\sim 10^6$  CFU/mL of KPC-producing *K. pneumoniae* clinical isolates: (i) BRKP07 (polymyxin B MIC: 0.5 mg/L, minocycline MIC: 2 mg/L) and (ii) BRKP21 (polymyxin B MIC: 0.5 mg/L, minocycline MIC: 16 mg/L).
